# Supplementary material for: Investigation of the molecular structure of the radical anions of some pyrimidine-type bases in aqueous solution by comparison of calculated hyperfine coupling constants with EPR resultsElectronic supplementary information (ESI) available: calculated hfc constants depending on the level of geometry optimisation and structure of the hydrogen bonded complex of a uracil radical anion with 5 water molecules. See http://www.rsc.org/suppdata/cp/b2/b207732a/
Source: Royal Society of Chemistry journal article supplement (doi:10.1039/b207732a), 2002-11-22
Supplement: tables_figures.doc [file tables_figures.doc]

### Supporting Information : Table 5, 6 and Figure 8

**Table 5.** Calculated isotropic hfcc a(MHz) of nonplanar uracil radical anion in the gas phase and in aqueous solution in dependence on the level of geometry optimisation by B3LYP method and two SCRF Onsager (SCRF=Dipole) and SCRF=CPCM models.  -deviation of C6-H out of the molecular plane, *) planar structure is shown for comparison.

| Basis set | 6-31G(d) | 6-31G(d,p) | 6-311G(d,p) | 6-31+G(d,p) | 6-311+G(d,p) | 6-311+G(2df,p) | 6-311++G(2df,p)  //6-311+G(d,p) | Exp |
| --- | --- | --- | --- | --- | --- | --- | --- | --- |
| Structure |  |  |  |  |  |  | Planar*) |  |
| Vacuum |  |  |  |  |  |  | sp |  |
| a(N,1) | -0.75 | -0.73 | -2.18 | 0.76 | -0.95 | -0.56 | -1.76 | 0 |
| a(N,3) | 3.31 | 3.20 | 1.37 | 2.38 | 0.91 | 1.24 | 1.36 | 4.1 |
| a(H,1) | 8.07 | 7.15 | 3.12 | -1.26 | -1.49 | -1.53 | -4.68 | 2.4 |
| a(H,3) | -4.64 | -4.76 | -5.47 | -5.57 | -5.00 | -5.38 | -6.11 | 2.4 |
| a(H,5) | -6.16 | -6.18 | -6.81 | -8.15 | -7.21 | -6.64 | -4.89 | 2.5 |
| a(H,6) | 16.79 | 13.81 | 10.87 | 2.49 | 0.51 | 0.16 | -42.17 | 35.0 |
|  | 30.4 | 28.7 | 28.0 | 22.5 | 21.6 | 21.8 | 0.0 |  |
| Water  Onsager |  |  |  |  |  |  |  |  |
| A(N,1) | -0.69 | -0.60 | -1.68 | 0.85 | -1.18 | 0.78 |  | 0 |
| A(N,3) | 4.14 | 3.61 | 1.34 | 2.93 | 1.57 | 1.50 |  | 4.1 |
| A(H,1) | 5.18 | 4.52 | -1.79 | -4.57 | -4.76 | -4.13 |  | 2.4 |
| A(H,3) | -3.76 | -4.55 | -5.59 | -3.72 | -2.32 | -4.26 |  | 2.4 |
| A(H,5) | -3.42 | -4.38 | -5.65 | -4.77 | -3.33 | -3.64 |  | 2.5 |
| A(H,6) | 3.20 | 3.74 | -2.91 | -17.30 | -23.87 | -19.54 |  | 35.0 |
|  | 27.7 | 27.6 | 23.9 | 17.9 | 14.6 | 16.3 |  |  |
| Water  CPCM |  |  |  |  |  |  |  |  |
| A(N,1) | 0.50 | 0.42 | -1.55 | 0.59 | -1.48 | -0.98 |  | 0 |
| A(N,3) | 3.43 | 3.41 | 2.17 | 3.43 | 1.65 | 1.85 |  | 4.1 |
| A(H,1) | -3.97 | -4.23 | -5.22 | -4.95 | -4.77 | -4.51 |  | 2.4 |
| A(H,3) | -6.70 | -6.59 | -5.33 | -5.51 | -5.39 | -5.91 |  | 2.4 |
| A(H,5) | -4.77 | -4.62 | -4.72 | -3.26 | -2.85 | -3.76 |  | 2.5 |
| A(H,6) | -10.61 | -15.04 | -26.78 | -28.73 | -28.38 | -28.01 |  | 35.0 |
|  | 22.7 | 21.2 | 15.6 | 14.0 | 12.8 | 12.7 |  |  |

**Table 6.** Basis set dependence of the B3LYP calculated isotropic hfc constants a(MH) of nonplanar uracil radical anion in aqueous solution (different SCRF models) by fixed geometry. a) at fixed water B3LYP/6-311+G(d,p)/Dipole (Onsager) geometry. b) at fixed water B3LYP/6-311+G(d,p)/CPCM geometry. Planar structure is shown for comparison.

| Basis set | 6-31G(d) | 6-31G(d,p) | 6-311G(d,p) | 6-31+G(d,p) | 6-311+G(d,p) | 6-311+G(2df,p) | 6-311++G(2df,p) | EPR-2 | EPR-3 | 6-311++G(2df,p) | Exp |
| --- | --- | --- | --- | --- | --- | --- | --- | --- | --- | --- | --- |
| Structure |  |  |  |  | nonplanar |  |  |  |  | planar |  |
| SCRF=Dipolea) |  |  |  |  |  |  |  |  |  |  |  |
| a(N,1) | 0.13 | 0.14 | -1.45 | 0.92 | -1.18 | -0.53 | -0.54 | -0.42 | -0.19 |  | ~0 |
| a(N,3) | 4.17 | 4.11 | 2.36 | 3.10 | 1.57 | 1.78 | 1.88 | 2.26 | 2.11 |  | 4.1 |
| a(H,1) | -5.49 | -5.41 | -5.26 | -5.11 | -4.76 | -4.70 | -4.42 | -5.31 | -4.50 |  | 2.4 |
| a(H,3) | -2.71 | -2.64 | -2.70 | -2.69 | -2.32 | -2.05 | -2.36 | -2.14 | -2.17 |  | 2.4 |
| a(H,5) | -6.19 | -6.18 | -5.59 | -4.93 | -3.33 | -3.53 | -4.14 | -5.34 | -4.34 |  | 2.5 |
| a(H,6) | -27.83 | -27.30 | -25.00 | -24.81 | -23.87 | -22.36 | -21.69 | -22.71 | -22.55 |  | 35.0 |
| SCRF=PCMa) |  |  |  |  |  |  |  |  |  |  |  |
| a(N,1) | 0.14 | 0.16 | -1.83 | 0.78 | -1.33 | -0.25 | -0.28 | -0.79 | -0.06 | -1.29 | ~0 |
| a(N,3) | 4.52 | 4.45 | 2.85 | 3.66 | 2.05 | 2.44 | 2.49 | 2.58 | 2.78 | 1.87 | 4.1 |
| a(H,1) | -5.42 | -5.37 | -4.75 | -5.12 | -5.06 | -5.17 | -5.13 | -5.04 | -4.93 | -5.57 | 2.4 |
| a(H,3) | -3.25 | -3.18 | -3.20 | -3.16 | -2.89 | -2.89 | -2.95 | -2.48 | -2.90 | -7.01 | 2.4 |
| a(H,5) | -5.34 | -5.34 | -4.06 | -4.08 | -0.98 | -3.00 | -2.73 | -3.18 | -3.04 | -2.08 | 2.5 |
| a(H,6) | -29.55 | -29.00 | -26.75 | -26.41 | -26.59 | -22.46 | -22.64 | -26.39 | -22.86 | -43.94 | 35.0 |
| SCRF=IPCMa) |  |  |  |  |  |  |  |  |  |  |  |
| a(N,1) | -0.02 | -0.01 | -1.75 | 0.43 | -1.49 | -1.02 | -1.03 | -0.94 | -0.72 | -2.03 | ~0 |
| a(N,3) | 4.69 | 4.62 | 2.87 | 3.64 | 1.98 | 2.3 | 2.31 | 2.77 | 2.72 | 1.61 | 4.1 |
| a(H,1) | -5.32 | -5.08 | -5.26 | -4.82 | -4.56 | -4.33 | -4.31 | -4.96 | -4.44 | -4.86 | 2.4 |
| a(H,3) | -3.18 | -3.10 | -3.27 | -2.95 | -2.66 | -2.50 | -2.49 | -2.55 | -2.37 | -6.89 | 2.4 |
| a(H,5) | -3.30 | -3.33 | -3.18 | -2.20 | -1.94 | -1.68 | -1.68 | -2.89 | -1.91 | -0.67 | 2.5 |
| a(H,6) | -30.92 | -30.36 | -27.08 | -28.13 | -25.51 | -24.62 | -24.59 | -25.71 | -26.09 | -44.88 | 35.0 |
| SCRF=CPCMb) |  |  |  |  |  |  |  |  |  |  |  |
| a(N,1) | -0.08 | -0.07 | -2.26 | 0.42 | -1.48 | -1.00 | -0.73 | -1.31 | -0.06 |  | ~0 |
| a(N,3) | 3.89 | 3.83 | 2.14 | 3.35 | 1.65 | 1.99 | 2.05 | 2.27 | 2.69 |  | 4.1 |
| a(H,1) | -5.16 | -5.16 | -4.42 | -4.93 | -4.77 | -4.52 | -4.86 | -4.69 | -5.09 |  | 2.4 |
| a(H,3) | -5.59 | -5.59 | -5.50 | -5.68 | -5.39 | -5.27 | -5.37 | -5.16 | -4.51 |  | 2.4 |
| a(H,5) | -5.24 | -5.24 | -4.28 | -3.94 | -2.85 | -2.58 | -2.93 | -3.40 | -2.68 |  | 2.5 |
| a(H,6) | -34.32 | -33.73 | -30.75 | -31.30 | -28.38 | -27.57 | -27.24 | -30.98 | -27.12 |  | 35.0 |

Figure 8. B3LYP/6-31+G(d,p) calculated structure of the hydrogen bonded complex from uracil radical anion with 5 water molecules.
